# Supplementary material for: The Effect of Coronavirus Outbreak on the Utilization of Coronary Revascularization Procedures: An Interrupted Time Series Analysis
Source: MDPI journal article supplement (doi:10.3390/jcdd10030102), 2023-02-27
Supplement: s1 [file s1]

Table 1. Main characteristics of the patients receiving coronary artery by-pass surgery (CABG) during the time-period analyzed

| YEAR | MONTH | Women (%) | Admission to ICU (%) | Elixhauser Comorbidity Index* | Age*  | Severity* | Risk of Mortality* |
|------|-------|-----------|----------------------|-------------------------------|-------|-----------|--------------------|
| 2016 | 1.00  | 23,90     | 31,16                | 2,02                          | 67,70 | 2,16      | 1,98               |
|      | 2.00  | 23,58     | 30,28                | 2,08                          | 67,95 | 2,10      | 1,94               |
|      | 3.00  | 23,62     | 30,18                | 2,01                          | 67,35 | 2,14      | 1,95               |
|      | 4.00  | 22,81     | 29,56                | 2,06                          | 67,14 | 2,06      | 1,92               |
|      | 5.00  | 22,16     | 30,55                | 2,01                          | 67,15 | 2,03      | 1,84               |
|      | 6.00  | 23,02     | 30,60                | 2,17                          | 67,73 | 2,08      | 1,89               |
|      | 7.00  | 22,47     | 31,25                | 2,04                          | 66,68 | 2,08      | 1,86               |
|      | 8.00  | 23,08     | 31,78                | 1,97                          | 67,09 | 2,11      | 1,91               |
|      | 9.00  | 22,08     | 29,03                | 2,03                          | 66,41 | 2,05      | 1,86               |
|      | 10.00 | 24,43     | 31,72                | 2,05                          | 67,83 | 2,05      | 1,94               |
|      | 11.00 | 24,87     | 30,52                | 2,09                          | 68,09 | 2,04      | 1,84               |
|      | 12.00 | 22,52     | 32,04                | 2,08                          | 67,65 | 2,17      | 1,97               |
| 2017 | 1.00  | 22,97     | 29,29                | 2,29                          | 67,40 | 2,19      | 1,98               |
|      | 2.00  | 23,10     | 32,30                | 2,20                          | 68,93 | 2,16      | 1,94               |
|      | 3.00  | 23,31     | 32,18                | 2,28                          | 67,50 | 2,16      | 1,95               |
|      | 4.00  | 23,91     | 32,05                | 2,25                          | 67,17 | 2,17      | 2,01               |
|      | 5.00  | 22,49     | 28,93                | 2,15                          | 67,14 | 2,11      | 1,92               |
|      | 6.00  | 24,77     | 31,10                | 2,24                          | 67,89 | 2,15      | 1,99               |
|      | 7.00  | 24,03     | 32,46                | 2,10                          | 67,46 | 2,11      | 1,92               |
|      | 8.00  | 23,50     | 31,32                | 2,16                          | 67,45 | 2,11      | 1,90               |
|      | 9.00  | 23,36     | 31,26                | 2,15                          | 67,85 | 2,14      | 1,94               |
|      | 10.00 | 24,58     | 30,37                | 2,15                          | 67,29 | 2,16      | 1,94               |
|      | 11.00 | 23,89     | 33,96                | 2,22                          | 67,43 | 2,14      | 1,98               |
|      | 12.00 | 23,65     | 31,33                | 2,19                          | 68,17 | 2,20      | 2,06               |
| 2018 | 1.00  | 23,40     | 35,87                | 2,22                          | 67,67 | 2,23      | 1,99               |
|      | 2.00  | 23,45     | 33,53                | 2,30                          | 67,44 | 2,23      | 2,02               |
|      | 3.00  | 24,49     | 33,27                | 2,32                          | 67,26 | 2,25      | 1,95               |
|      | 4.00  | 22,77     | 33,93                | 2,24                          | 67,11 | 2,16      | 1,93               |
|      | 5.00  | 22,18     | 35,29                | 2,24                          | 68,10 | 2,19      | 1,93               |
|      | 6.00  | 24,06     | 36,82                | 2,21                          | 67,22 | 2,21      | 1,96               |
|      | 7.00  | 23,56     | 35,99                | 2,02                          | 66,14 | 2,14      | 1,92               |
|      | 8.00  | 24,66     | 34,14                | 1,99                          | 66,71 | 2,13      | 1,84               |
|      | 9.00  | 24,45     | 36,47                | 2,02                          | 66,53 | 2,07      | 1,78               |
|      | 10.00 | 24,54     | 37,31                | 1,99                          | 68,01 | 2,07      | 1,81               |
|      | 11.00 | 23,67     | 35,02                | 2,23                          | 67,29 | 2,18      | 1,92               |
|      | 12.00 | 23,44     | 36,24                | 2,08                          | 66,96 | 2,16      | 1,93               |
| 2019 | 1.00  | 23,14     | 37,63                | 2,22                          | 67,55 | 2,24      | 1,97               |
|      | 2.00  | 25,06     | 35,60                | 2,09                          | 67,19 | 2,13      | 1,88               |
|      | 3.00  | 24,11     | 35,17                | 2,04                          | 67,38 | 2,13      | 1,88               |

|      |       |       |       |      |       |      |      |
|------|-------|-------|-------|------|-------|------|------|
|      | 4.00  | 23,17 | 34,95 | 2,09 | 67,28 | 2,20 | 1,95 |
|      | 5.00  | 23,91 | 38,99 | 2,12 | 67,60 | 2,21 | 1,93 |
|      | 6.00  | 25,12 | 37,03 | 2,01 | 67,39 | 2,10 | 1,83 |
|      | 7.00  | 26,21 | 35,86 | 2,06 | 67,93 | 2,18 | 1,89 |
|      | 8.00  | 26,43 | 36,12 | 2,05 | 66,93 | 2,20 | 1,94 |
|      | 9.00  | 24,32 | 37,12 | 2,24 | 66,92 | 2,26 | 1,98 |
|      | 10.00 | 24,47 | 36,11 | 2,22 | 67,58 | 2,23 | 1,99 |
|      | 11.00 | 24,52 | 37,20 | 2,13 | 67,70 | 2,28 | 1,97 |
|      | 12.00 | 22,41 | 33,97 | 2,15 | 67,39 | 2,25 | 2,00 |
| 2020 | 1.00  | 23,66 | 36,40 | 2,21 | 67,72 | 2,29 | 2,04 |
|      | 2.00  | 23,13 | 35,20 | 2,07 | 67,81 | 2,19 | 1,94 |
|      | 3.00  | 23,12 | 37,74 | 2,16 | 67,03 | 2,23 | 1,94 |
|      | 4.00  | 24,04 | 37,47 | 2,17 | 65,05 | 2,09 | 1,92 |
|      | 5.00  | 23,73 | 33,63 | 2,09 | 65,99 | 2,12 | 1,86 |
|      | 6.00  | 25,40 | 32,13 | 2,25 | 66,69 | 2,25 | 1,99 |
|      | 7.00  | 24,77 | 30,56 | 2,13 | 67,83 | 2,19 | 1,93 |
|      | 8.00  | 24,20 | 32,95 | 2,16 | 67,21 | 2,20 | 1,92 |
|      | 9.00  | 23,87 | 35,07 | 2,19 | 66,62 | 2,21 | 1,94 |
|      | 10.00 | 23,97 | 33,73 | 2,23 | 66,57 | 2,25 | 2,05 |
|      | 11.00 | 0,00  | 0,00  | 2,19 | 67,24 | 2,23 | 1,96 |
|      | 12.00 | 0,00  | 0,00  | 2,29 | 66,80 | 2,35 | 2,09 |

ICU: Intensive Care Unit

\* means

Table 2. Main characteristics of the patients receiving percutaneous coronary interventions (PCI) during the time-period analyzed

| Year | Month | Women | Admission to ICU (%) | Elixhauser Comorbidity Index* | Age*  | Severity* | Risk of Mortality* |
|------|-------|-------|----------------------|-------------------------------|-------|-----------|--------------------|
| 2016 | 1.00  | 23,90 | 31,16                | 1,49                          | 65,76 | 1,69      | 1,59               |
|      | 2.00  | 23,58 | 30,28                | 1,48                          | 65,78 | 1,68      | 1,60               |
|      | 3.00  | 23,62 | 30,18                | 1,50                          | 65,65 | 1,70      | 1,62               |
|      | 4.00  | 22,81 | 29,56                | 1,48                          | 65,27 | 1,69      | 1,58               |
|      | 5.00  | 22,16 | 30,55                | 1,47                          | 65,62 | 1,66      | 1,57               |
|      | 6.00  | 23,02 | 30,60                | 1,49                          | 65,06 | 1,66      | 1,57               |
|      | 7.00  | 22,47 | 31,25                | 1,53                          | 65,24 | 1,67      | 1,56               |
|      | 8.00  | 23,08 | 31,78                | 1,46                          | 64,89 | 1,69      | 1,59               |
|      | 9.00  | 22,08 | 29,03                | 1,47                          | 65,39 | 1,67      | 1,56               |
|      | 10.00 | 24,43 | 31,72                | 1,47                          | 66,09 | 1,67      | 1,57               |
|      | 11.00 | 24,87 | 30,52                | 1,55                          | 66,41 | 1,68      | 1,58               |
|      | 12.00 | 22,52 | 32,04                | 1,51                          | 66,47 | 1,71      | 1,61               |
| 2017 | 1.00  | 22,97 | 29,29                | 1,52                          | 65,99 | 1,70      | 1,61               |
|      | 2.00  | 23,10 | 32,30                | 1,48                          | 65,71 | 1,65      | 1,54               |
|      | 3.00  | 23,31 | 32,18                | 1,54                          | 65,41 | 1,66      | 1,57               |
|      | 4.00  | 23,91 | 32,05                | 1,52                          | 65,22 | 1,69      | 1,60               |
|      | 5.00  | 22,49 | 28,93                | 1,48                          | 65,59 | 1,68      | 1,57               |
|      | 6.00  | 24,77 | 31,10                | 1,47                          | 65,29 | 1,63      | 1,53               |
|      | 7.00  | 24,03 | 32,46                | 1,52                          | 65,52 | 1,67      | 1,58               |
|      | 8.00  | 23,50 | 31,32                | 1,49                          | 65,17 | 1,64      | 1,56               |
|      | 9.00  | 23,36 | 31,26                | 1,52                          | 65,55 | 1,67      | 1,57               |
|      | 10.00 | 24,58 | 30,37                | 1,48                          | 65,19 | 1,66      | 1,58               |
|      | 11.00 | 23,89 | 33,96                | 1,57                          | 66,27 | 1,70      | 1,60               |
|      | 12.00 | 23,65 | 31,33                | 1,57                          | 65,92 | 1,70      | 1,63               |
| 2018 | 1.00  | 23,40 | 35,87                | 1,48                          | 65,67 | 1,70      | 1,62               |
|      | 2.00  | 23,45 | 33,53                | 1,54                          | 65,81 | 1,72      | 1,62               |
|      | 3.00  | 24,49 | 33,27                | 1,54                          | 65,63 | 1,71      | 1,61               |
|      | 4.00  | 22,77 | 33,93                | 1,58                          | 65,42 | 1,70      | 1,60               |
|      | 5.00  | 22,18 | 35,29                | 1,51                          | 65,22 | 1,67      | 1,58               |
|      | 6.00  | 24,06 | 36,82                | 1,56                          | 65,54 | 1,69      | 1,59               |
|      | 7.00  | 23,56 | 35,99                | 1,53                          | 64,86 | 1,67      | 1,57               |
|      | 8.00  | 24,66 | 34,14                | 1,54                          | 64,91 | 1,67      | 1,58               |
|      | 9.00  | 24,45 | 36,47                | 1,58                          | 65,57 | 1,70      | 1,61               |
|      | 10.00 | 24,54 | 37,31                | 1,55                          | 66,09 | 1,69      | 1,60               |
|      | 11.00 | 23,67 | 35,02                | 1,56                          | 65,91 | 1,70      | 1,61               |
|      | 12.00 | 23,44 | 36,24                | 1,61                          | 66,02 | 1,75      | 1,67               |
| 2019 | 1.00  | 23,14 | 37,63                | 1,57                          | 66,20 | 1,72      | 1,63               |
|      | 2.00  | 25,06 | 35,60                | 1,57                          | 65,59 | 1,71      | 1,62               |
|      | 3.00  | 24,11 | 35,17                | 1,55                          | 65,71 | 1,71      | 1,61               |

|      |       |       |       |      |       |      |      |
|------|-------|-------|-------|------|-------|------|------|
|      | 4.00  | 23,17 | 34,95 | 1,59 | 66,14 | 1,72 | 1,62 |
|      | 5.00  | 23,91 | 38,99 | 1,57 | 66,04 | 1,69 | 1,59 |
|      | 6.00  | 25,12 | 37,03 | 1,60 | 65,62 | 1,69 | 1,61 |
|      | 7.00  | 26,21 | 35,86 | 1,61 | 65,53 | 1,67 | 1,58 |
|      | 8.00  | 26,43 | 36,12 | 1,55 | 65,35 | 1,69 | 1,60 |
|      | 9.00  | 24,32 | 37,12 | 1,61 | 65,86 | 1,69 | 1,61 |
|      | 10.00 | 24,47 | 36,11 | 1,61 | 66,31 | 1,69 | 1,60 |
|      | 11.00 | 24,52 | 37,20 | 1,63 | 66,49 | 1,71 | 1,61 |
|      | 12.00 | 22,41 | 33,97 | 1,60 | 66,04 | 1,73 | 1,64 |
| 2020 | 1.00  | 23,66 | 36,40 | 1,58 | 65,89 | 1,73 | 1,64 |
|      | 2.00  | 23,13 | 35,20 | 1,60 | 66,09 | 1,72 | 1,63 |
|      | 3.00  | 23,12 | 37,74 | 1,55 | 65,50 | 1,71 | 1,62 |
|      | 4.00  | 24,04 | 37,47 | 1,66 | 64,76 | 1,77 | 1,68 |
|      | 5.00  | 23,73 | 33,63 | 1,65 | 64,76 | 1,75 | 1,63 |
|      | 6.00  | 25,40 | 32,13 | 1,65 | 65,79 | 1,76 | 1,66 |
|      | 7.00  | 24,77 | 30,56 | 1,69 | 65,44 | 1,76 | 1,65 |
|      | 8.00  | 24,20 | 32,95 | 1,63 | 65,44 | 1,76 | 1,66 |
|      | 9.00  | 23,87 | 35,07 | 1,64 | 65,73 | 1,75 | 1,63 |
|      | 10.00 | 23,97 | 33,73 | 1,67 | 65,98 | 1,77 | 1,67 |
|      | 11.00 | 0,00  | 0,00  | 1,66 | 65,98 | 1,76 | 1,66 |
|      | 12.00 | 0,00  | 0,00  | 1,68 | 65,67 | 1,79 | 1,69 |

ICU: Intensive Care Unit

\* means
